# Supplementary material for: Versatile metal–organic frameworks as a catalyst and an indicator of nitric oxide
Source: Royal Society of Chemistry journal article supplement (doi:10.1039/d2tb00480a), 2022-01-01
Supplement: d2tb00480a1.pdf [file d2tb00480a1.pdf]

## **Supporting Information**

### **Versatile metal organic frameworks as catalysis and indicator of nitric oxide**

Pinghua Ling,<sup>\*</sup>, Xianping Gao, Xinyu Sun, Pei Yang and Feng Gao<sup>\*</sup>

Laboratory of Functionalized Molecular Solids, Ministry of Education, Anhui Key Laboratory of  
Chemo/Biosensing, College of Chemistry and Materials Science, Anhui Normal University, Wuhu  
241002, P. R. China.

## Experimental Section

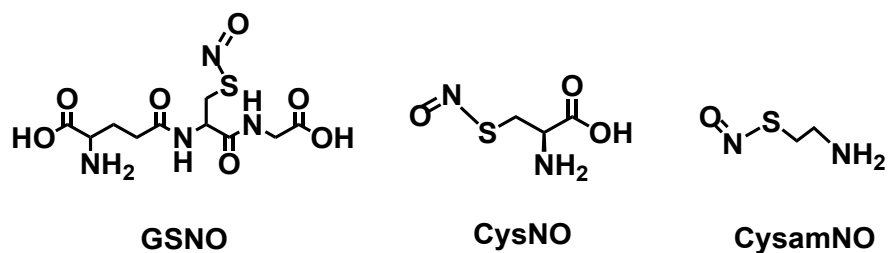

**Scheme S1.** Molecular structures of bioavailable RSNO: s-nitrosoglutathione (GSNO), s-nitrosocysteine (CysNO), and s-nitrosocysteamine (CysamNO).

## FT-IR spectroscopy

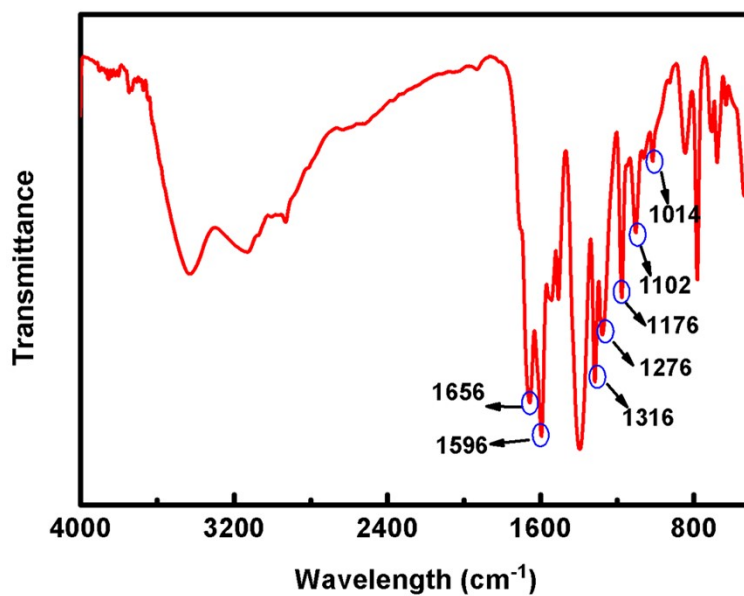

**Fig. S1.** FTIR spectrum of Cu-MOFs.

## TGA analysis

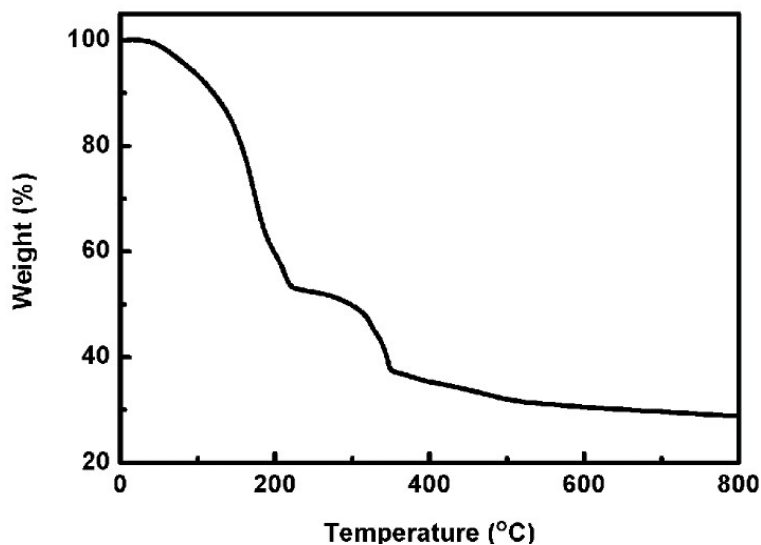

**Fig. S2.** Thermogravimetric analysis (TGA) curve of Cu-MOFs.

## FL Behaviors of Cu-MOFs towards CysamNO and GSNO

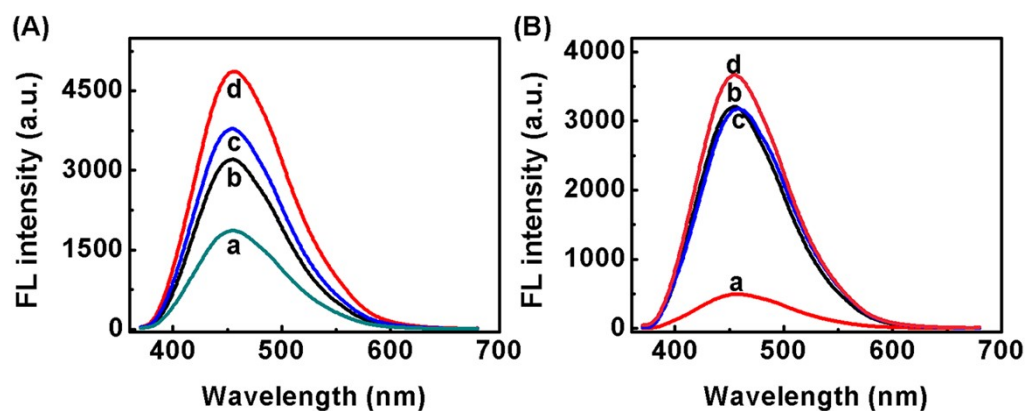

**Fig. S3.** Fluorescence emission spectra of Cu-MOFs in response to (A) 60  $\mu$ M CysamNO (a), 2.5  $\mu$ M NO (b), (b) + 60  $\mu$ M CysamNO (c), and (a) + 2.5  $\mu$ M NO (d), and (B) 60  $\mu$ M GSNO (a), 2.5  $\mu$ M NO (b), (b) + 60  $\mu$ M GSNO (c) and 60  $\mu$ M GSNO + 2.5  $\mu$ M NO (d). The emission wavelength was at 450 nm.

## Catalytic test

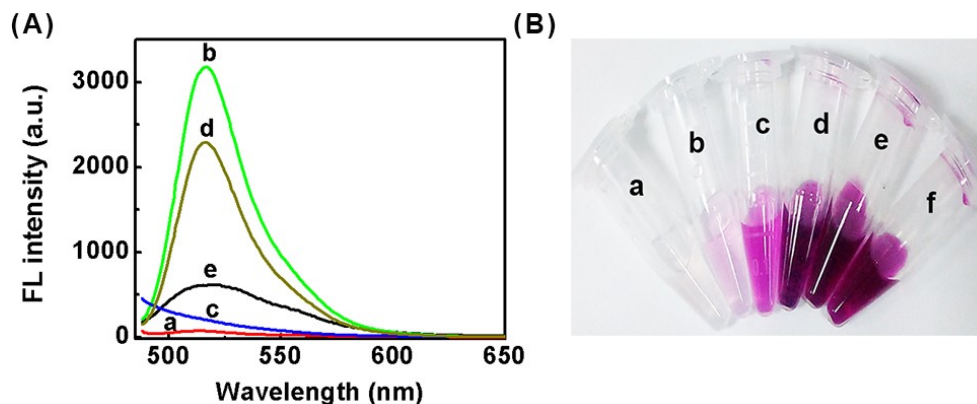

**Fig. S4.** (A) Fluorescence emission spectra of DAF-FM DA without (a), and with 0.17 mM NO (b), Cu-MOFs (c), (c) + 0.17 mM NO (d), and (c) + 0.5 mM CysNO (e). (B) The photographs of the NO assay kit, in response to Cu-MOFs (a), standard (b), 0.33 mM NO (c), 1.7 mM GSNO (d), 1.7 mM CysNO (e) and 1.7 mM CysamNO (f). Ex =470 nm, Em= 515 nm.

## XPS characterization

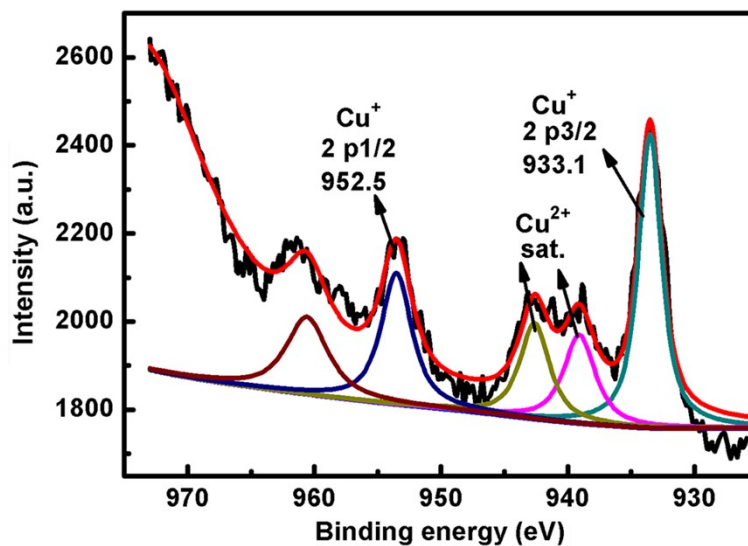

**Fig. S5.** XPS spectroscopy of Cu-MOFs immersing into NO-saturated solution for 3 h.

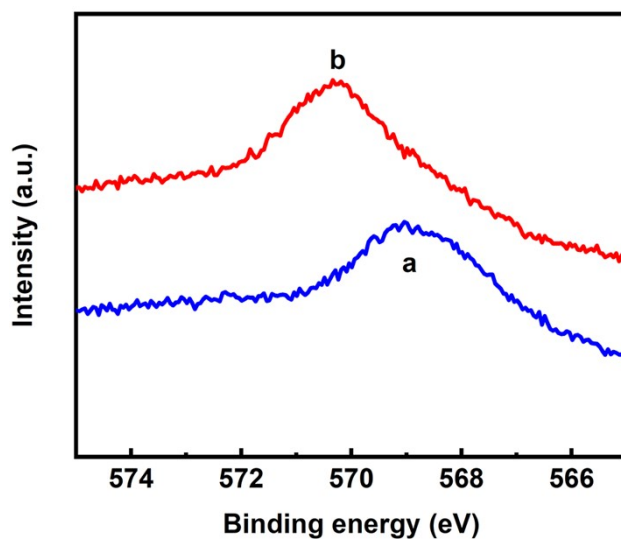

**Fig. S6.** Auger spectra (Cu  $L_{3M_{4,5}M_{4,5}}$  peak) of the Cu-MOFs (a) and Cu-MOFs immersing into GSNO (10 mM) for 3 h (b).

**Table S1. Emission Lifetimes ( $\tau$ ) of Different Samples**

| Samples      | $\tau_1$ (ns) | $\tau_2$ (ns) |
|--------------|---------------|---------------|
| MOFs         | 0.33          |               |
| MOFs+NO      | 0.46          | 2.66          |
| MOFs+CysamNO | 0.47          | 2.53          |

### **Fluorescence Response of Cu-MOF to Concentration of NO**

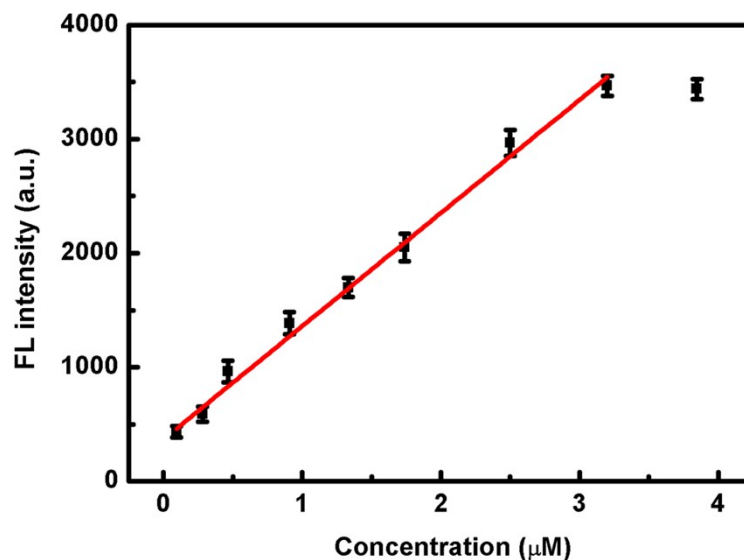

**Fig. S7.** Fluorescence intensity vs. concentrations of NO determined by the Cu-MOFs ( $E_m = 450$  nm).

### Stability of Cu-MOFs under in Vitro and In Vivo Conditions

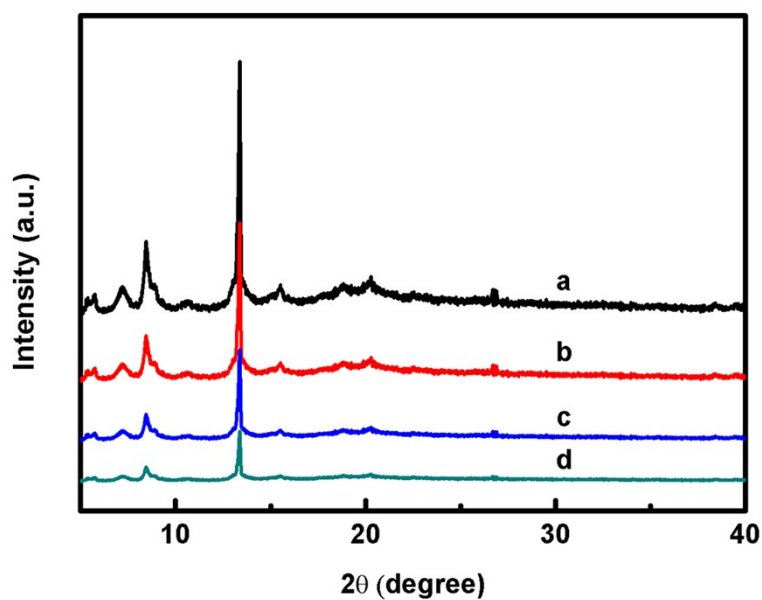

**Fig. S8.** pXRD patterns of Cu-MOF immersed in pH 7.4 PBS (a); DMEM (maintained with 5% CO<sub>2</sub> buffer) (b); 0.1 M GSNO in PBS (c); NO-saturated PBS (37 °C, pH 7.4) (d) at 37 °C for 12 h.

## Evaluation of Cytotoxicity of Cu-MOFs

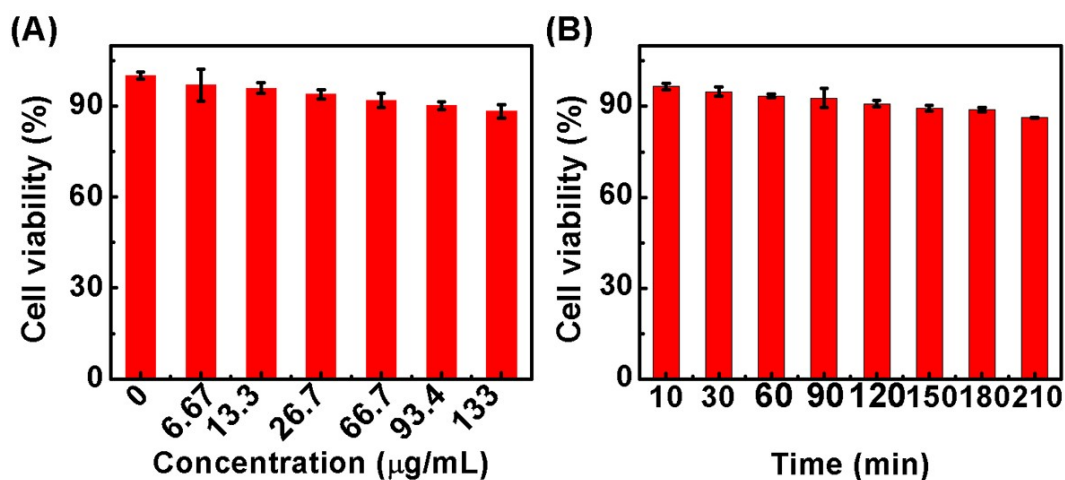

**Fig. S9.** Cell viability test of Cu-MOFs with different (A) concentrations, (B) incubation time in HeLa cell line.

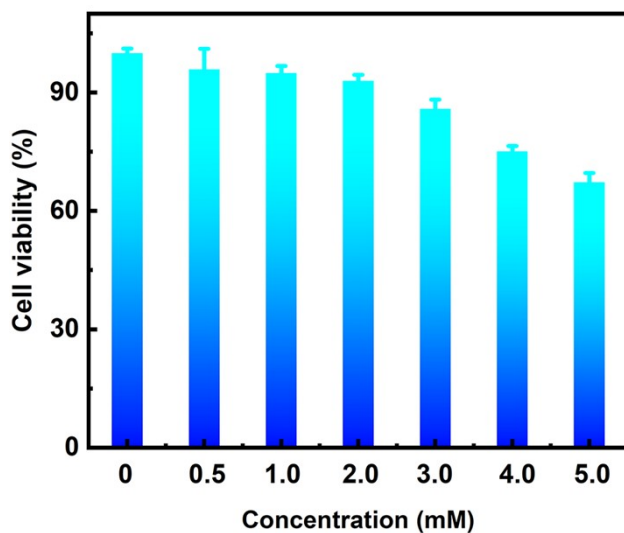

**Fig. S10.** Cell viability test of Cu-MOFs with different concentrations of Sodium Nitroprusside

## Optimization of Cu-MOFs Concentrations and Incubation Time

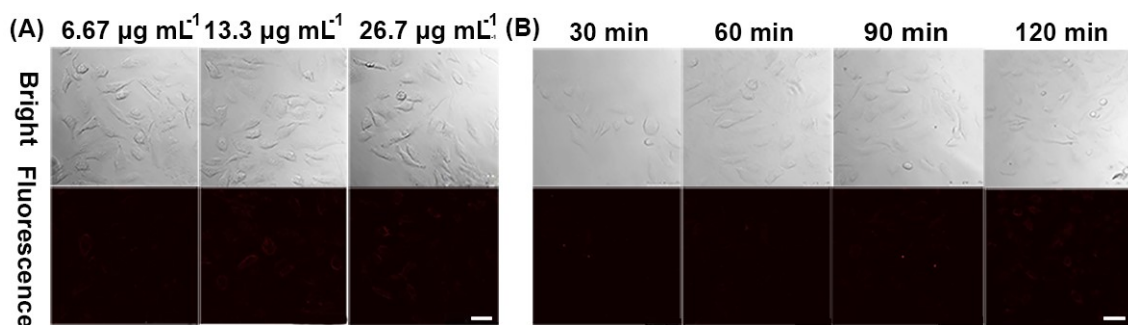

**Fig. S11.** Confocal microscopy using HeLa cells at different (A) concentrations and (B) incubation time of Cu-MOFs. Scale bar represents 40  $\mu\text{m}$  (Ex=405 nm).

### Cellular Behaviors of Cu-MOFs

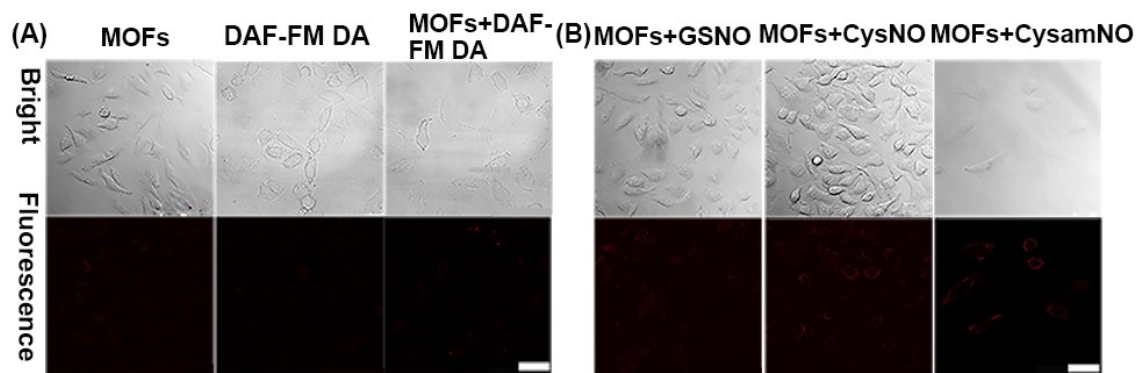

**Fig. S12.** Confocal microscopy using HeLa cells (A) intracellular luminescence response to Cu-MOFs (Ex= 405 nm), DAF-FM DA (Ex=488 nm) and DAF-FM DA+Cu-MOF (Ex=488 nm), and (B) Cu-MOFs+20  $\mu\text{M}$  GSNO, 20  $\mu\text{M}$  CysNO and 20  $\mu\text{M}$  CysamNO. Scale bar represents 50  $\mu\text{m}$  (Ex=405 nm).



## Demonstration of Self-Controlled

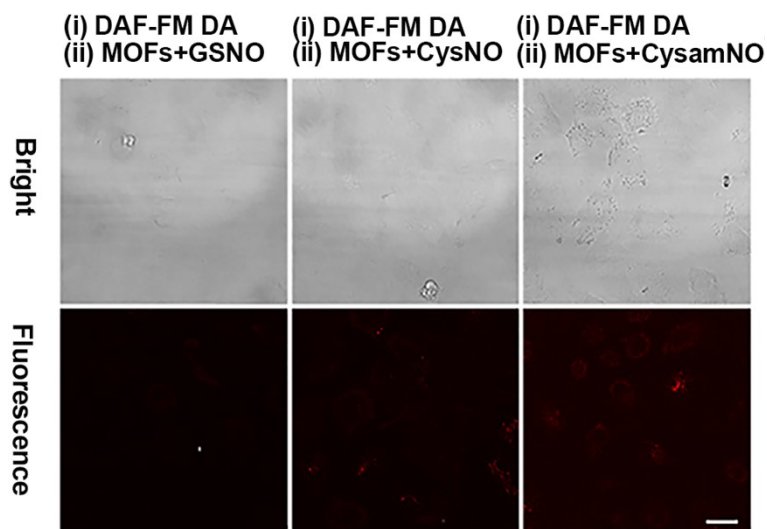

**Fig. S13.** Confocal microscopy using HeLa cells to study the property of Cu-MOFs self-controlled by DAF-FM DA. The cells were incubated for 30 min at 37 °C with DAF-FM DA (5 mM) and then incubated for another 90 min with 20  $\mu$ M GSNO, CysNO and CysamNO, and 26.7  $\mu$ g/mL Cu-MOFs. Scale bar represents 30  $\mu$ m (Ex=488 nm).
